# Supplementary material for: A Novel Peptide Oligomer of Bacitracin Induces M1 Macrophage Polarization by Facilitating Ca2+ Influx
Source: PubMed Central journal article supplement (PMC7352993; doi:10.3390/nu12061603), 2020-05-29
Supplement: nutrients-12-01603-s001.pdf [file nutrients-12-01603-s001.pdf]

**Supplementary Table S1.** Primary and secondary antibodies used for immunoblotting.

| <b>Antibodies</b>        | <b>Supplier</b>                                 | <b>Item No.</b> | <b>Dilution</b> |
|--------------------------|-------------------------------------------------|-----------------|-----------------|
| Actin                    | Santa Cruz Biotechnology, Inc.                  | sc-1615         | 1:2,000         |
| COX-2                    | Santa Cruz Biotechnology, Inc.                  | sc-19999        | 1:1,000         |
| ERK                      | Cell Signaling Technology<br>(Beverly, MA, USA) | #1647           | 1:1,000         |
| I $\kappa$ B- $\alpha$   | Santa Cruz Biotechnology, Inc.                  | sc-371          | 1:1,000         |
| IL-1 $\beta$             | Santa Cruz Biotechnology, Inc.                  | sc-7884         | 1:500           |
| iNOS                     | BD Biosciences (San Jose, CA,<br>USA)           | 610333          | 1:1,000         |
| JNK                      | Cell Signaling Technology                       | #9252           | 1:1,000         |
| Lamin B1                 | Santa Cruz Biotechnology, Inc.                  | sc-374015       | 1:1,000         |
| NF- $\kappa$ B p65       | Santa Cruz Biotechnology, Inc.                  | sc-109          | 1:1,000         |
| p38 MAPK                 | Santa Cruz Biotechnology, Inc.                  | sc-535          | 1:1,000         |
| phosphor-ERK             | Cell Signaling Technology                       | #9106           | 1:1,000         |
| phosphor-JNK             | Cell Signaling Technology                       | #9255           | 1:1,000         |
| phosphor-p38 MAPK        | Cell Signaling Technology                       | #9211           | 1:1,000         |
| PKC $\alpha$             | Abcam Inc. (Cambridge, UK)                      | ab4124          | 1:500           |
| PKC $\beta$              | Abcam Inc.                                      | ab32026         | 1:500           |
| PKC $\epsilon$           | Abcam Inc.                                      | ab63638         | 1:500           |
| PLC $\gamma$ 1           | Santa Cruz Biotechnology, Inc.                  | sc-7290         | 1:500           |
| TNF- $\alpha$            | Cell Signaling Technology                       | #3707           | 1:1,000         |
| goat anti-mouse IgG-HRP  | Santa Cruz Biotechnology, Inc.                  | sc-2005         | 1:1,500         |
| goat anti-rabbit IgG-HRP | Santa Cruz Biotechnology, Inc.                  | sc-2004         | 1:1,500         |

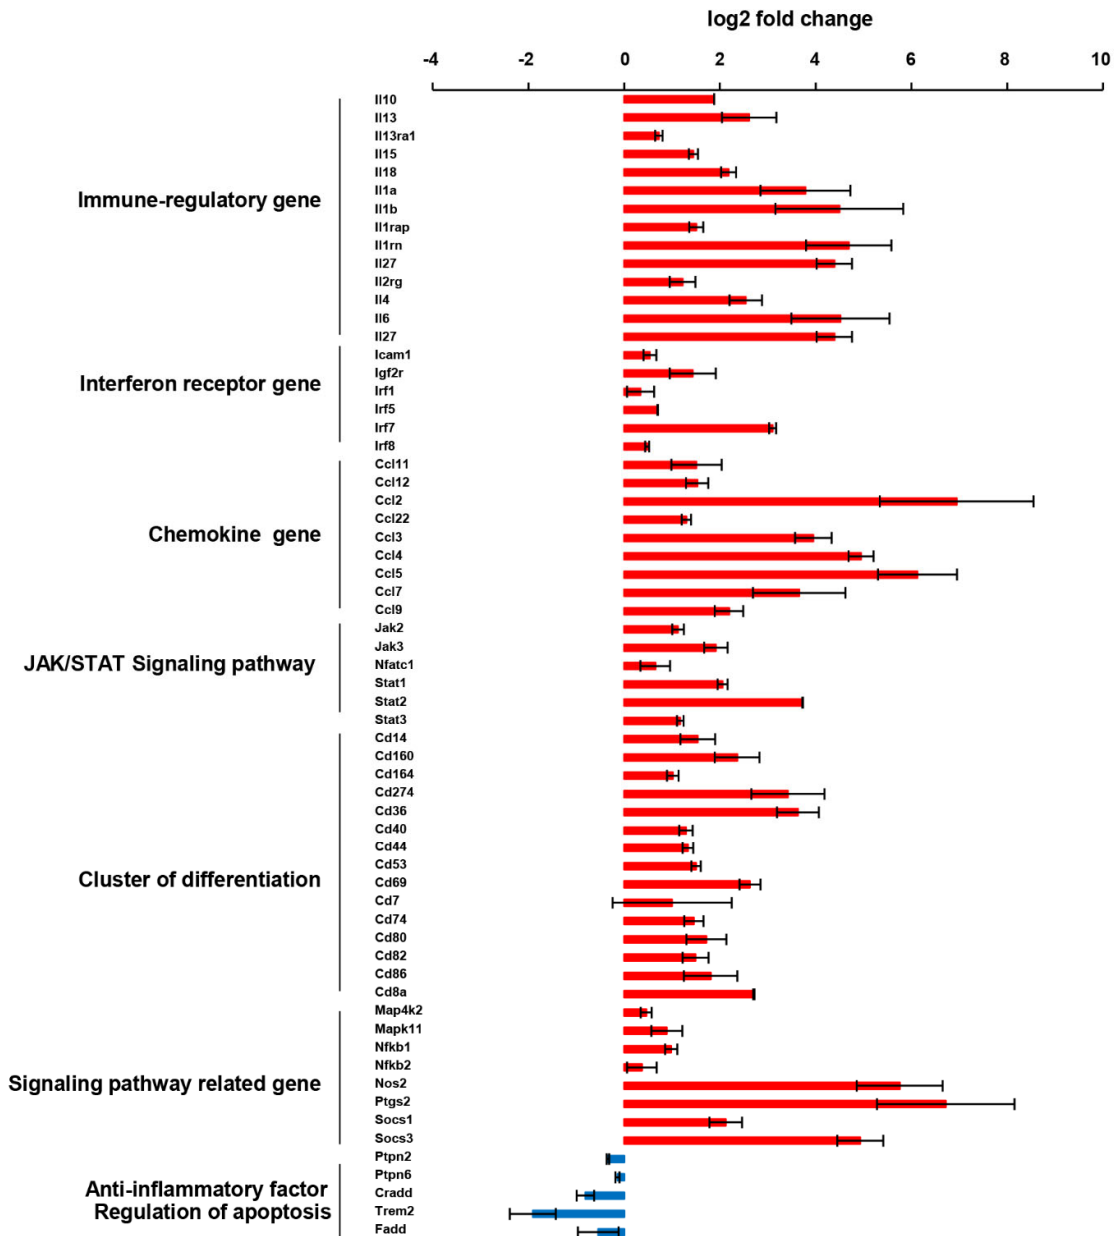

**Supplementary Figure S1.** Histogram shows the log<sub>2</sub>-fold change of each genes in expression between untreated cells and 88.0  $\mu$ M CSP32-treated cells. Total RNA was collected by harvesting the CSP32- and LPS-treated cells after 24 h (n=2). The raw data were normalized using housekeeping genes, and fold change data was log<sub>2</sub>-transformed.

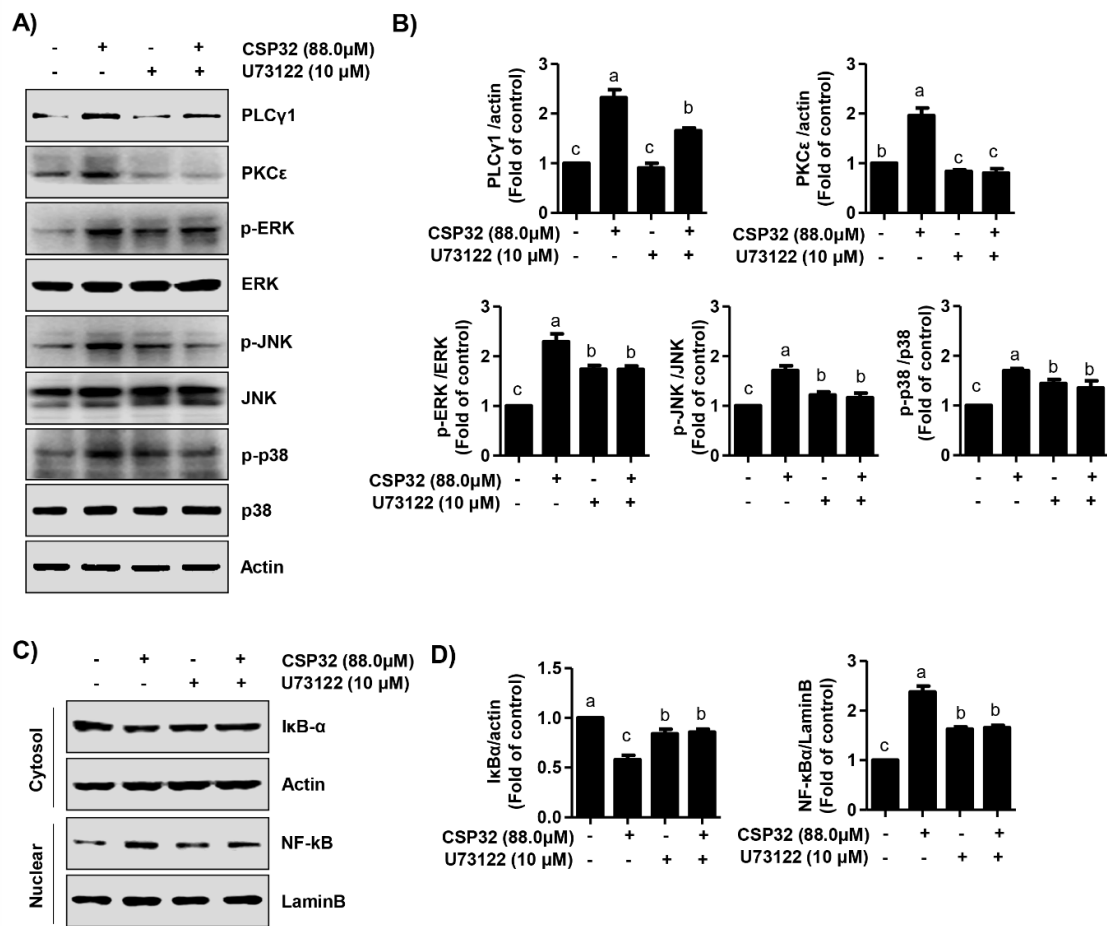

**Supplementary Figure S2.** CPS32-mediated M1 macrophage polarization regulates by PLC signaling pathway. Cells were pretreated with or without 10 μM U73122, a PLC inhibitor, for 30 min and then incubated with the 88.0 μM of CSP32 for 2 h. (A) Total cell lysates were examined by Western blotting. β-actin was used as an internal control. (C) Cytoplasmic and nuclear lysates were examined by Western blotting for IκB-α and NF-κB. Actin and lamin B1 serve as the internal controls for the cytoplasmic and nuclear lysates, respectively. (B and D) Quantitative analysis of protein expression. The expression of each protein was indicated as a fold change relative to the control. Data are expressed as the mean ± SD (n=3). <sup>a-c</sup>Bars with different letters are significantly different at  $p < 0.05$ .
